# Supplementary material
Source: publisher site journal article supplement (https://www.degruyterbrill.com/publication/isbn/9783110961591/downloadAsset/9783110961591_Inhaltsverzeichnis.pdf)
Supplement: Supplementary file 1 [file 9783110961591_Inhaltsverzeichnis.pdf]

---

## **Inhalt**

|                                                                   |      |
|-------------------------------------------------------------------|------|
| Verzeichnis der Autoren: Bände 1–12 .....                         | VI   |
| Verzeichnis der Pseudonyme .....                                  | XVI  |
| Aufzeichnungsschema .....                                         | XVII |
| Verzeichnis der Abkürzungen von Zeitungen und Zeitschriften ..... | XIX  |
| Abkürzungen und Siglen (vorderes und hinteres Vorsatzpapier)      |      |

Autoren

Hirs – Jaco
